# Supplementary material for: Global Association of Cold Spells and Adverse Health Effects: A Systematic Review and Meta-Analysis
Source: PubMed Central journal article supplement (PMC4710591; doi:10.1289/ehp.1408104), 2015-05-15
Supplement: ehp.1408104.s001.acco.pdf [file ehp.1408104.s001.acco.pdf]

**Note to Readers:** *EHP* strives to ensure that all journal content is accessible to all readers. However, some figures and Supplemental Material published in *EHP* articles may not conform to 508 standards due to the complexity of the information being presented. If you need assistance accessing journal content, please contact [ehp508@niehs.nih.gov](mailto:ehp508@niehs.nih.gov). Our staff will work with you to assess and meet your accessibility needs within 3 working days.

## **Supplemental Material**

### **Global Association of Cold Spells and Adverse Health Effects: A Systematic Review and Meta-Analysis**

Niilo R.I. Rytö, Yuming Guo, and Jouni J.K. Jaakkola

#### **Table of Contents**

**Part 1.** Formation of the stratum-specific effect estimates in the two-stage meta-analysis.

**Table S1.** Primary values derived from the original articles and effect estimates used in the meta-analysis: all non-accidental causes.

**Table S2.** Primary values derived from the original articles and effect estimates used in the meta-analysis: cardiovascular diseases.

**Table S3.** Primary values derived from the original articles and effect estimates used in the meta-analysis: respiratory diseases.

**Table S4.** Primary values derived from the original articles and effect estimates used in the meta-analysis: males, all non-accidental causes.

**Table S5.** Primary values derived from the original articles and effect estimates used in the meta-analysis: females, all non-accidental causes.

**Table S6.** Primary values derived from the original articles and effect estimates used in the meta-analysis: ages 0-64, all non-accidental causes.

**Table S7.** Primary values derived from the original articles and effect estimates used in the meta-analysis: ages 65+, all non-accidental causes.

**Table S8.** Characteristics of studies included in the systematic review but not in a group, complementary information.

**Table S9.** Estimation of mortality in the index periods (cold spells) and reference periods for the studies in the meta-analyses.

## **References**

**Part 1.** Formation of the stratum-specific effect estimates in the two-stage meta-analysis.

Xie et al. (2013) provided effect estimates in the age strata 0-64, 65-74, and  $\geq 75$  without presenting an estimate for ages  $\geq 65$ . We used the effect estimates for the age groups 65-74 and  $\geq 75$  to calculate a summary-effect estimate for the age group  $\geq 65$  using the two-stage meta-analysis (Table S7). The three effect estimates for Xie et al. (2013) present in figures (2-4), and tables (S1-S6) represent cold spells in different cities.

Ma et al. (2012) provided effect estimates for multiple age groups (0-4, 5-44, 45-64, and  $\geq 65$ ) without presenting an estimate for the age group 0-64. We used the effect estimates for the age groups 0-4, 5-44, and 45-64 to calculate a summary-effect estimate for age group 0-64 using the two-stage meta-analysis (Table S6).

Revich and Shaposhnikov (2010) provided effect estimates in two age strata, 30-64 and  $\geq 65$ . We used the effect estimates for the age groups 30-64 and  $\geq 65$  to calculate a summary-effect estimate for the whole age range using the two-stage meta-analysis (Tables S1 and S2). The original estimate for ages 30-64 was deemed representative of ages 0-64 and used in the meta-analyses as such (Table S6). It should be noted that Revich and Shaposhnikov (2010) reported that the number of deaths under 30 years was too small to analyze. Effect estimates were also provided for diagnoses that did not cover the whole range of cardiovascular (ICD-10 I00-I99) diseases. We used the effect estimates for diagnoses of ischemic heart disease and cerebrovascular diseases to calculate a summary-effect estimate for cardiovascular diseases using the two-stage meta-analysis (Table S2). Revich and Shaposhnikov (2010) reported that based on absolute numbers of deaths, these two were the most significant causes among cardiovascular deaths.

Kyselý et al. (2009) provided effect estimates for cardiovascular mortality stratified by sex, without presenting an estimate for both sexes combined. We used the effect estimates for males (all ages) and females (all ages) to calculate a summary-effect estimate for cardiovascular mortality using the two-stage meta-analysis (Table S2). It should be noted that Kyselý et al. (2009) did not include age groups 0-24 in their analyses because of the very small sample size of this group in their cardiovascular mortality data.

Revich and Shaposhnikov (2008) provided effect estimates only in the age stratum of  $\geq 75$  years. The effect estimates in the age stratum  $\geq 75$  were deemed representative of the age stratum  $\geq 65$  years but not of the whole age range 0 to 65 and over, and were used in the meta-analyses accordingly. The two effect estimates for Revich and Shaposhnikov (2008) present in figures and tables represent 2 different cold spells (Table S7).

Huynen et al. (2001) provided effect estimates for independent cold spells occurring on different years (Tables S1-S3). These observations were deemed independent and used in the meta-analyses accordingly. Suitable age-stratified effect estimates were available for one year only (Tables S6 and S7).

Borst et al. (1997) provided effect estimates for age strata  $< 65$ , 65-74, 75-84, 85-94, and  $> 95$  without presenting an effect estimate for ages  $\geq 65$ . We used the effect estimates for the age groups 65-74, 75-84, 85-94, and  $> 95$  to calculate a summary-effect estimate for age group  $\geq 65$  using the two-stage meta-analysis (Table SS7). Borst et al. (1997) provided effect estimates for diagnoses that did not cover the whole range of cardiovascular (ICD-10 I00-I99) or respiratory (J00-J99) diseases. We used the effect estimates of cardiac disease and cerebrovascular accident

(Table S2) to calculate a summary-effect estimate for cardiovascular diseases using the two stage meta-analysis. We used COPD to represent respiratory diseases (Table S3).

**Table S1.** Primary values derived from the original articles and effect estimates used in the meta-analysis: all non-accidental causes.

| Source                       | Location     | Cause of Death | Gender | Age   | Rate Ratio (95% CI)  | Effect Type | Lag Days | Secondary-Rate Ratio (95% CI) |
|------------------------------|--------------|----------------|--------|-------|----------------------|-------------|----------|-------------------------------|
| Xie et al. 2013              | Guangzhou    | Non-accidental | both   | all   | 1.60 (1.19, 2.14)    | cumulative  | 27       | 1.018 (1.007, 1.029)          |
| Xie et al. 2013              | Nanxiong     | Non-accidental | both   | all   | 1.55 (0.77, 3.11)    | cumulative  | 27       | 1.016 (0.990, 1.043)          |
| Xie et al. 2013              | Taishan      | Non-accidental | both   | all   | 1.72 (1.17, 2.55)    | cumulative  | 27       | 1.020 (1.006, 1.035)          |
| Ma et al. 2012               | Shanghai     | Non-accidental | both   | all   | 1.13 (1.07, 1.19)    | daily       | 0        | 1.130 (1.073, 1.190)          |
| Revich and Shaposhnikov 2010 | East Siberia | Non-accidental | both   | 30–64 | 0.80 (0.52, 1.08)    | daily       | 0        | ↴                             |
| Revich and Shaposhnikov 2010 | East Siberia | Non-accidental | both   | 65+   | 1.33 (1.06, 1.60)    | daily       | 0        | 1.046 (0.636, 1.721)          |
| Borst et al. 1997            | Netherlands  | All            | both   | all   | 1.22 (1.17, 1.27)    | daily       | 0        | 1.220 (1.172, 1.270)          |
| Huynen et al. 2001           | Netherlands  | All            | both   | all   | 1.101 (0.942, 1.392) | daily       | 0        | 1.101 (0.871, 1.392)          |
| Huynen et al. 2001           | Netherlands  | All            | both   | all   | 1.268 (1.063, 1.397) | daily       | 0        | 1.268 (1.151, 1.397)          |
| Huynen et al. 2001           | Netherlands  | All            | both   | all   | 1.123 (0.769, 1.240) | daily       | 0        | 1.123 (1.017, 1.240)          |

Abbreviations: Rate Ratio, mortality-rate ratio, derived from the original article; Secondary-Rate Ratio, study-specific effect estimate used in the meta-analysis; 95% CI, 95% confidence interval; “↴” indicates that more than one value contributed to the study-specific effect estimate presented below the arrow. Definitions: Effect Type = cumulative if the effect estimate presented in the study was calculated for a time period; Effect Type = daily if the effect was estimated per one day; Lag Days, the number of days used in the conversion of a cumulative measure to a daily measure.

**Table S2.** Primary values derived from the original articles and effect estimates used in the meta-analysis: cardiovascular diseases.

| Source                       | Location       | Cause of Death | Gender | Age   | Rate Ratio (95% CI)  | Effect Type | Lag Days | Summary-Rate Ratio (95% CI) |
|------------------------------|----------------|----------------|--------|-------|----------------------|-------------|----------|-----------------------------|
| Xie et al. 2013              | Guangzhou      | CVD            | both   | all   | 1.59 (0.99, 2.55)    | cumulative  | 27       | 1.017 (1.000, 1.035)        |
| Xie et al. 2013              | Nanxiong       | CVD            | both   | all   | 0.72 (0.28, 1.85)    | cumulative  | 27       | 0.988 (0.954, 1.023)        |
| Xie et al. 2013              | Taishan        | CVD            | both   | all   | 1.73 (1.06, 2.83)    | cumulative  | 27       | 1.021 (1.002, 1.039)        |
| Ma et al. 2012               | Shanghai       | CVD            | both   | all   | 1.21 (1.12, 1.31)    | daily       | 0        | 1.210 (1.118, 1.310)        |
| Kysely et al. 2009           | Czech Republic | CVD            | male   | all   | 1.063 (1.042, 1.083) | cumulative  | 2        | ↴                           |
| Kysely et al. 2009           | Czech Republic | CVD            | female | all   | 1.063 (1.044, 1.082) | cumulative  | 9        | 1.018 (0.994, 1.042)        |
| Revich and Shaposhnikov 2010 | East Siberia   | IHD            | both   | 30–64 | 1.78 (1.19, 2.37)    | daily       | 0        | ↴                           |
| Revich and Shaposhnikov 2010 | East Siberia   | IHD            | both   | 65+   | 1.60 (1.05, 2.15)    | daily       | 0        | ↴                           |
| Revich and Shaposhnikov 2010 | East Siberia   | Cerebro        | both   | 30–64 | 0.65 (0.00, 1.45)    | daily       | 0        | ↴                           |
| Revich and Shaposhnikov 2010 | East Siberia   | Cerebro        | both   | 65+   | 2.31 (1.63, 2.99)    | daily       | 0        | 1.635 (1.131, 2.363)        |
| Borst et al. 1997            | Netherlands    | CD             | both   | all   | 1.31 (1.18, 1.44)    | daily       | 0        | ↴                           |
| Borst et al. 1997            | Netherlands    | Cerebro        | both   | all   | 1.24 (1.10, 1.40)    | daily       | 0        | 1.283 (1.191, 1.382)        |
| Chen et al. 2010             | Taiwan         | CVD            | both   | all   | 1.089 (0.760, 1.560) | daily       | 0        | 1.089 (0.760, 1.560)        |
| Yang et al. 2009             | Taiwan         | CVD            | both   | all   | 1.120 (0.456, 2.752) | daily       | 0        | 1.120 (0.456, 2.752)        |
| Huynen et al. 2001           | Netherlands    | CVD            | both   | all   | 1.134 (0.943, 1.473) | daily       | 0        | 1.134 (0.873, 1.473)        |
| Huynen et al. 2001           | Netherlands    | CVD            | both   | all   | 1.230 (1.020, 1.444) | daily       | 0        | 1.230 (1.047, 1.444)        |
| Huynen et al. 2001           | Netherlands    | CVD            | both   | all   | 1.181 (0.953, 1.559) | daily       | 0        | 1.181 (0.895, 1.559)        |

Abbreviations: Rate Ratio, mortality-rate ratio, derived from the original article; Secondary-Rate Ratio, study-specific effect estimate used in the meta-analysis; 95% CI, 95% confidence interval; “↴” indicates that more than one value contributed to the study-specific effect estimate presented below the arrow; CVD, cardiovascular diseases; IHD, ischemic heart disease; Cerebro, cerebrovascular disease or cerebrovascular accident; CD, cardiac disease. Definitions: Effect Type = cumulative if the effect estimate presented in the study was calculated for a time period; Effect Type = daily if the effect was estimated per one day; Lag Days, the number of days used in the conversion of a cumulative measure to a daily measure.

**Table S3.** Primary values derived from the original articles and effect estimates used in the meta-analysis: respiratory diseases.

| Source             | Location    | Cause of Death | Gender | Age | Rate Ratio (95% CI)  | Effect Type | Lag Days | Secondary-Rate Ratio (95% CI) |
|--------------------|-------------|----------------|--------|-----|----------------------|-------------|----------|-------------------------------|
| Xie et al. 2013    | Guangzhou   | Resp           | both   | all | 2.33 (1.22, 4.46)    | cumulative  | 27       | 1.032 (1.007, 1.057)          |
| Xie et al. 2013    | Nanxiong    | Resp           | both   | all | 1.53 (0.63, 3.68)    | cumulative  | 27       | 1.016 (0.983, 1.049)          |
| Xie et al. 2013    | Taishan     | Resp           | both   | all | 3.38 (1.54, 7.41)    | cumulative  | 27       | 1.046 (1.016, 1.077)          |
| Ma et al. 2012     | Shanghai    | Resp           | both   | all | 1.14 (0.98, 1.32)    | daily       | 0        | 1.140 (0.985, 1.320)          |
| Borst et al. 1997  | Netherlands | COPD           | both   | all | 1.28 (0.92, 1.77)    | daily       | 0        | 1.280 (0.926, 1.770)          |
| Huynen et al. 2001 | Netherlands | Resp           | both   | all | 1.053 (0.635, 3.159) | daily       | 0        | 1.053 (0.351, 3.159)          |
| Huynen et al. 2001 | Netherlands | Resp           | both   | all | 2.172 (1.332, 2.440) | daily       | 0        | 2.172 (1.933, 2.440)          |
| Huynen et al. 2001 | Netherlands | Resp           | both   | all | 1.087 (0.675, 2.921) | daily       | 0        | 1.087 (0.404, 2.921)          |

Abbreviations: Rate Ratio, mortality-rate ratio, derived from the original article; Secondary-Rate Ratio, study-specific effect estimate used in the meta-analysis; 95% CI, 95% confidence interval; “1” indicates that more than one value contributed to the study-specific effect estimate presented below the arrow; Resp, respiratory diseases; COPD, chronic obstructive pulmonary disease. Definitions: Effect Type = cumulative if the effect estimate presented in the study was calculated for a time period; Effect Type = daily if the effect was estimated per one day; Lag Days, the number of days used in the conversion of a cumulative measure to a daily measure.



**Table S4.** Primary values derived from the original articles and effect estimates used in the meta-analysis: males, all non-accidental causes.

| Source            | Location    | Cause of Death | Gender | Age | Rate Ratio (95% CI) | Effect Type | Lag Days | Secondary-Rate Ratio (95% CI) |
|-------------------|-------------|----------------|--------|-----|---------------------|-------------|----------|-------------------------------|
| Xie et al. 2013   | Guangzhou   | Non-accidental | male   | all | 1.70 (1.17, 2.48)   | cumulative  | 27       | 1.020 (1.006, 1.034)          |
| Xie et al. 2013   | Nanxiong    | Non-accidental | male   | all | 1.46 (0.62, 3.43)   | cumulative  | 27       | 1.014 (0.983, 1.047)          |
| Xie et al. 2013   | Taishan     | Non-accidental | male   | all | 1.87 (1.13, 3.09)   | cumulative  | 27       | 1.023 (1.005, 1.043)          |
| Ma et al. 2012    | Shanghai    | Non-accidental | male   | all | 1.17 (1.09, 1.26)   | daily       | 0        | 1.170 (1.086, 1.260)          |
| Borst et al. 1997 | Netherlands | All            | male   | all | 1.22 (1.14, 1.30)   | daily       | 0        | 1.220 (1.145, 1.300)          |

Abbreviations: Rate Ratio, mortality-rate ratio, derived from the original article; Secondary-Rate Ratio, study-specific effect estimate used in the meta-analysis; 95% CI, 95% confidence interval; “1” indicates that more than one value contributed to the study-specific effect estimate presented below the arrow. Definitions: Effect Type = cumulative if the effect estimate presented in the study was calculated for a time period; Effect Type = daily if the effect was estimated per one day; Lag Days, the number of days used in the conversion of a cumulative measure to a daily measure.

**Table S5.** Primary values derived from the original articles and effect estimates used in the meta-analysis: females, all non-accidental causes.

| Source            | Location    | Cause of Death | Gender | Age | Rate Ratio (95% CI) | Effect Type | Lag Days | Secondary-Rate Ratio (95% CI) |
|-------------------|-------------|----------------|--------|-----|---------------------|-------------|----------|-------------------------------|
| Xie et al. 2013   | Guangzhou   | Non-accidental | female | all | 1.47 (0.96, 2.26)   | cumulative  | 27       | 1.014 (0.998, 1.031)          |
| Xie et al. 2013   | Nanxiong    | Non-accidental | female | all | 1.71 (0.71, 4.11)   | cumulative  | 27       | 1.020 (0.987, 1.054)          |
| Xie et al. 2013   | Taishan     | Non-accidental | female | all | 1.55 (0.89, 2.70)   | cumulative  | 27       | 1.016 (0.996, 1.037)          |
| Ma et al. 2012    | Shanghai    | Non-accidental | female | all | 1.08 (1.00, 1.17)   | daily       | 0        | 1.080 (0.997, 1.170)          |
| Borst et al. 1997 | Netherlands | All            | female | all | 1.23 (1.17, 1.29)   | daily       | 0        | 1.230 (1.173, 1.290)          |

Abbreviations: Rate Ratio, mortality-rate ratio, derived from the original article; Secondary-Rate Ratio, study-specific effect estimate used in the meta-analysis; 95% CI, 95% confidence interval; “†” indicates that more than one value contributed to the study-specific effect estimate presented below the arrow. Definitions: Effect Type = cumulative if the effect estimate presented in the study was calculated for a time period; Effect Type = daily if the effect was estimated per one day; Lag Days, the number of days used in the conversion of a cumulative measure to a daily measure.

**Table S6.** Primary values derived from the original articles and effect estimates used in the meta-analysis: ages 0-64, all non-accidental causes.

| Source                       | Location     | Cause of Death | Gender | Age   | Rate Ratio (95% CI)  | Effect Type | Lag Days | Secondary-Rate Ratio (95% CI) |
|------------------------------|--------------|----------------|--------|-------|----------------------|-------------|----------|-------------------------------|
| Xie et al. 2013              | Guangzhou    | Non-accidental | both   | 0–64  | 1.47 (0.80, 2.68)    | cumulative  | 27       | 1.014 (0.992, 1.037)          |
| Xie et al. 2013              | Nanxiong     | Non-accidental | both   | 0–64  | 1.97 (0.74, 5.25)    | cumulative  | 27       | 1.025 (0.989, 1.063)          |
| Xie et al. 2013              | Taishan      | Non-accidental | both   | 0–64  | 1.13 (0.53, 2.44)    | cumulative  | 27       | 1.005 (0.976, 1.034)          |
| Ma et al. 2012               | Shanghai     | Non-accidental | both   | 0–4   | 1.33 (0.50, 3.55)    | daily       | 0        | ↴                             |
| Ma et al. 2012               | Shanghai     | Non-accidental | both   | 5–44  | 0.85 (0.53, 1.37)    | daily       | 0        | ↴                             |
| Ma et al. 2012               | Shanghai     | Non-accidental | both   | 45–64 | 1.06 (0.91, 1.23)    | daily       | 0        | 1.045 (0.908, 1.202)          |
| Revich and Shaposhnikov 2010 | East Siberia | Non-accidental | both   | 30–64 | 0.80 (0.52, 1.08)    | daily       | 0        | 0.800 (0.520, 1.080)          |
| Borst et al. 1997            | Netherlands  | All            | both   | <65   | 1.00 (0.80, 1.27)    | daily       | 0        | 1.000 (0.787, 1.270)          |
| Huynen et al. 2001           | Netherlands  | All            | both   | 0–64  | 1.150 (0.882, 1.764) | daily       | 0        | 1.150 (0.750, 1.764)          |

Abbreviations: Rate Ratio, mortality-rate ratio, derived from the original article; Secondary-Rate Ratio, study-specific effect estimate used in the meta-analysis; 95% CI, 95% confidence interval; “↴” indicates that more than one value contributed to the study-specific effect estimate presented below the arrow. Definitions: Effect Type = cumulative if the effect estimate presented in the study was calculated for a time period; Effect Type = daily if the effect was estimated per one day; Lag Days, the number of days used in the conversion of a cumulative measure to a daily measure.

**Table S7.** Primary values derived from the original articles and effect estimates used in the meta-analysis: ages 65+, all non-accidental causes.

| Source                       | Location     | Cause of Death | Gender | Age   | Rate Ratio (95% CI)  | Effect Type | Lag Days | Secondary-Rate Ratio (95% CI) |
|------------------------------|--------------|----------------|--------|-------|----------------------|-------------|----------|-------------------------------|
| Xie et al. 2013              | Guangzhou    | Non-accidental | both   | 65–74 | 1.85 (0.97, 3.51)    | cumulative  | 27       | ↴                             |
| Xie et al. 2013              | Guangzhou    | Non-accidental | both   | 75+   | 1.53 (1.05, 2.24)    | cumulative  | 27       | 1.018 (1.005, 1.030)          |
| Xie et al. 2013              | Nanxiong     | Non-accidental | both   | 65–74 | 1.82 (0.65, 5.09)    | cumulative  | 27       | ↴                             |
| Xie et al. 2013              | Nanxiong     | Non-accidental | both   | 75+   | 1.09 (0.41, 2.92)    | cumulative  | 27       | 1.012 (0.986, 1.039)          |
| Xie et al. 2013              | Taishan      | Non-accidental | both   | 65–74 | 0.90 (0.40, 2.01)    | cumulative  | 27       | ↴                             |
| Xie et al. 2013              | Taishan      | Non-accidental | both   | 75+   | 2.42 (1.50, 3.90)    | cumulative  | 27       | 1.017 (0.981, 1.054)          |
| Ma et al. 2012               | Shanghai     | Non-accidental | both   | 65+   | 1.14 (1.08, 1.21)    | daily       | 0        | 1.140 (1.074, 1.210)          |
| Revich and Shaposhnikov 2010 | East Siberia | Non-accidental | both   | 65+   | 1.33 (1.06, 1.60)    | daily       | 0        | 1.330 (1.060, 1.600)          |
| Borst et al. 1997            | Netherlands  | All            | both   | 65–74 | 1.11 (0.98, 1.27)    | daily       | 0        | ↴                             |
| Borst et al. 1997            | Netherlands  | All            | both   | 75–84 | 1.26 (1.18, 1.35)    | daily       | 0        | ↴                             |
| Borst et al. 1997            | Netherlands  | All            | both   | 85–94 | 1.25 (1.17, 1.33)    | daily       | 0        | ↴                             |
| Borst et al. 1997            | Netherlands  | All            | both   | 95+   | 1.44 (1.23, 1.68)    | daily       | 0        | 1.937 (1.352, 2.775)          |
| Revich and Shaposhnikov 2008 | Moscow       | Non-accidental | both   | 75+   | 1.099 (1.080, 1.118) | cumulative  | 11       | 1.009 (1.007, 1.010)          |
| Revich and Shaposhnikov 2008 | Moscow       | Non-accidental | both   | 75+   | 1.089 (1.067, 1.110) | cumulative  | 15       | 1.006 (1.004, 1.007)          |
| Huynen et al. 2001           | Netherlands  | All            | both   | 65+   | 1.116 (0.921, 1.505) | daily       | 0        | 1.116 (0.827, 1.505)          |

Abbreviations: Rate Ratio, mortality-rate ratio, derived from the original article; Summary-Rate Ratio, study-specific effect estimate used in the meta-analysis; 95% CI, 95% confidence interval; “↴” indicates that more than one value contributed to the study-specific effect estimate presented below the arrow. Definitions: Effect Type = cumulative if the effect estimate presented in the study was calculated for a time period; Effect Type = daily if the effect was estimated per one day; Lag Days, the number of days used in the conversion of a cumulative measure to a daily measure.

**Table S8.** Characteristics of studies included in the systematic review but not in a group, complementary information.

| Source           | Location              | Time period | Definition of cold spell (n of episodes)                                                       | Main outcomes and stratification by gender and age  | Potential confounders taken into account                  | Main findings and effect modification |
|------------------|-----------------------|-------------|------------------------------------------------------------------------------------------------|-----------------------------------------------------|-----------------------------------------------------------|---------------------------------------|
| Díaz et al. 2006 | City of Madrid, Spain | 1986-1997   | "Cold Wave": daily $T_{max} < 6^{\circ}C$ ; Duration: not defined a priori; (n= not available) | Mortality: All non-accidental, CVD; Male and female | $NO_x$ , $SO_2$ , $O_3$ , TSP, RH, Temporality, Influenza | Female > male                         |

Complementary information related to mortality or morbidity caused by cold spells. Díaz et al. (2006) does not fulfil the criteria for any of the main groups (Overall-effect Group, Added-effect Group, Temperature-change-effect Group). Abbreviations:  $T_{max}$ , daily maximum temperature; CVD, cardiovascular diseases;  $NO_x$ , nitrogen oxides;  $SO_2$ , sulfur dioxide;  $O_3$  ozone, TSP, total suspended particulate matter; Temporality, long- or short term temporal trends and/or seasonal variation and/or day of the week; Influenza, the days or cases associated with influenza epidemics.

**Table S9.** Estimation of mortality in the index periods (cold spells) and reference periods for the 9 studies in the meta-analyses.

| Source                       | Cold spell: Type                                                                                                                                                                                             | Cold spell: Mortality                                                                                                                                            | Reference period: Type                                         | Reference period: Mortality                                                                                                                                                                                                     |
|------------------------------|--------------------------------------------------------------------------------------------------------------------------------------------------------------------------------------------------------------|------------------------------------------------------------------------------------------------------------------------------------------------------------------|----------------------------------------------------------------|---------------------------------------------------------------------------------------------------------------------------------------------------------------------------------------------------------------------------------|
| Xie et al. 2013              | Using frequency distribution of all days of the study period statistically identifies winter cold spells; rarity is influenced by the duration of the study period and by the minimum duration of cold spell | Observed M during $\geq 5$ days with daily $T_{\min} < 5^{\text{th}}$ %centile                                                                                   | Annual cycle-based, Counterfactual inference                   | Expected M calculated using a 31-day moving average of daily M for cold-spell days of the 2 preceding years and 1 subsequent year combined                                                                                      |
| Ma et al. 2012               | Using frequency distribution of all days of the study period statistically identifies winter cold spells; rarity is influenced by the duration of the study period and by the minimum duration of cold spell | Observed M during $\geq 7$ days with daily $T_{\text{ave}} < 3^{\text{rd}}$ %centile                                                                             | Seasonally and weekly standardized, Counterfactual inference   | Observed M of near-term period with same duration and DOW than cold spell, preceding and following the cold spell, same year. Sensitivity analyses were conducted using same calendar days as the cold spell for previous years |
| Revich and Shaposhnikov 2010 | Using historic frequency distribution statistically identifies rare winter cold spells                                                                                                                       | Observed M during $\geq 9$ days with daily $T_{\text{mean}} < 3^{\text{rd}}$ %centile, of which $\geq 3$ d with daily $T_{\text{mean}} < 1^{\text{st}}$ %centile | Annual cycle-based, Counterfactual inference                   | Expected M calculated using a deseasonalizing smooth function (df=128 half a year); a proxy for expected background mortality during cold spell episodes                                                                        |
| Chen et al. 2010             | Identification does not necessarily depend on the season or the duration of the study period                                                                                                                 | Observed M 14 days after a temperature drop of $>8^{\circ}\text{C}$ or 14 days after $T_{\min} < 10^{\circ}\text{C}$                                             | Seasonally and annually standardized, Counterfactual inference | Observed M 14 days preceding the event                                                                                                                                                                                          |
| Yang et al. 2009             | Identification does not necessarily depend on the season or the duration of the study period                                                                                                                 | Observed M 14 days after a temperature drop of $>8^{\circ}\text{C}$ or 14 days after $T_{\min} < 10^{\circ}\text{C}$                                             | Seasonally and annually standardized, Counterfactual inference | Observed M 14 days preceding the event                                                                                                                                                                                          |
| Kyselý et al. 2009           | Applying absolute T threshold to all study days identifies winter cold spells; rarity does not depend on the duration of the study period                                                                    | Observed M during $\geq 3$ days with daily $T_{\text{max}} < -3.5^{\circ}\text{C}$                                                                               | Annual cycle-based, Counterfactual inference                   | Expected M calculated using a deseasonalizing smooth function; a proxy for expected background mortality for each cold spell day                                                                                                |
| Revich and Shaposhnikov 2008 | Using historical frequency distribution of each month statistically identifies rare cold spells for corresponding month during study period                                                                  | Observed M during $\geq 9$ days with daily $T_{\text{ave}} < 3^{\text{rd}}$ percentile of which $\geq 6$ d with daily $T_{\text{ave}} < 1^{\text{st}}$ %centile  | Annual cycle-based, Counterfactual inference                   | Expected M calculated using same calendar days during the other years of the study period; a proxy for expected background mortality                                                                                            |
| Huynen et al. 2001           | Applying absolute T threshold to all study days identifies winter cold spells; rarity does not depend on the duration of the study period                                                                    | Observed M during $\geq 9$ days with daily $T_{\min} \leq -5^{\circ}\text{C}$ , of which $\geq 6$ days with daily $T_{\min} \leq -10^{\circ}\text{C}$            | Annual cycle-based, Counterfactual inference                   | Expected M calculated using a 31-day moving average of daily M for cold spell days of the 2 preceding years combined                                                                                                            |
| Borst et al. 1997            | A proxy for winter cold spells; rarity does not depend on the duration of the study period or the duration of the cold spell                                                                                 | Observed M during all 7 day-periods with average of weekly $T_{\text{max}} < 5^{\circ}\text{C}$                                                                  | Period of lowest mortality, Counterfactual inference           | Observed M during all 7 day-periods with average of weekly $T_{\text{max}}$ 15.0-19.9C; optimum temperature range defined by lowest mortality in 6 temperature strata                                                           |

Abbreviations: M, mortality;  $T_{\min}$ , daily minimum temperature;  $T_{\text{ave}}$ , daily average temperature; DOW, day of the week;  $T_{\text{mean}}$ , daily mean temperature; df, degrees of freedom;  $T_{\text{max}}$ , daily maximum temperature. Definitions: Annual cycle-based, selection of the reference period takes into account potential annual cycles by using the same calendar days as the exposure from other years; Seasonally standardized, selection of the reference period takes into account potential seasonal variation by using near-term days of the same year or other years; Annually standardized, selection of the reference period takes into account potential differences between years by using days of the same year as the exposure; Weekly standardized, selection of the reference period takes into account potential variation by weekday by using same days of the week as the exposure, for the same year or other years; Rarity depends on the duration of the study period, the absolute number of days below a statistically defined percentile becomes greater if the number of days in the frequency distribution is increased. Rarity is still influenced by definition of minimum duration of the event, as it can't be controlled which portion of the individual cold days occur consecutively and which separately.

## References

Borst V, Schols JMGA, Mackenbach JP. 1997. Increased mortality among nursing home patients during ambient temperature extremes; more rise during hot than during cold spells. *Ned Tijdschr Geneesk* 141:2180–2183.

Chen VY, Wu PC, Yang TC, Su HJ. 2010. Examining non-stationary effects of social determinants on cardiovascular mortality after cold surges in Taiwan. *Sci Total Environ* 408:2042–2049.

Díaz J, Linares C, Tobías A. 2006. Impact of extreme temperatures on daily mortality in Madrid (Spain) among the 45-64 age-group. *Int J Biometeorol* 50:342–348.

Huynen MM, Martens P, Schram D, Weijenberg MP, Kunst AE. 2001. The impact of heat waves and cold spells on mortality rates in the Dutch population. *Environ Health Perspect* 109:463–470.

Kyselý J, Pokorna L, Kyncl J, Kriz B. 2009. Excess cardiovascular mortality associated with cold spells in the Czech Republic. *BMC Public Health* 9:19.

Ma W, Yang C, Chu C, Li T, Tan J, Kan H. 2012. The impact of the 2008 cold spell on mortality in Shanghai, China. *Int J Biometeorol* 57:179–84. doi:10.1007/s00484-012-0545-7.

Revich B, Shaposhnikov D. 2008. Excess mortality during heat waves and cold spells in Moscow, Russia. *Occup Environ Med* 65:691–696.

Revich BA, Shaposhnikov DA. 2010. Extreme temperature episodes and mortality in Yakutsk, East Siberia. *Rural Remote Health* [internet] 10:1338. Available: <http://www.rrh.org.au/articles/subviewnew.asp?ArticleID=1338>.

Xie H, Yao Z, Zhang Y, Xu Y, Xu X, Liu T, et al. 2013. Short-term effects of the 2008 cold spell on mortality in three subtropical cities in Guangdong Province, China. *Environ Health Perspect* 121:210–216.

Yang TC, Wu PC, Chen VY, Su HJ. 2009. Cold surge: a sudden and spatially varying threat to health? *Sci Total Environ* 407:3421–3424.
